# Supplementary material for: Digging deeper: structural background of PEGylated fibrin gels in cell migration and lumenogenesis
Source: Royal Society of Chemistry journal article supplement (doi:10.1039/c9ra08169k), 2020-01-01
Supplement: c9ra08169k1.pdf [file c9ra08169k1.pdf]

## Supplementary information

### Digging deeper: structural background of PEGylated fibrin gels in cell migration and lumenogenesis

Shpichka A.I.<sup>1</sup>, Konarev P.V.<sup>2,3</sup>, Efremov Yu.M.<sup>1</sup>, Kryukova A.E.<sup>2,3</sup>, Aksenova N.A.<sup>1,4</sup>, Kotova S.L.<sup>1,4</sup>, Frolova A.A.<sup>1</sup>, Kosheleva N.V.<sup>5,6</sup>, Zhigalina O.M.<sup>2,7</sup>, Yusupov V.I.<sup>8</sup>, Khmelenin D.N.<sup>2</sup>, Koroleva A.<sup>9</sup>, Volkov V.V.<sup>2</sup>, Asadchikov V.E.<sup>2</sup>, and Timashev P.S.<sup>1,4,8</sup>

<sup>1</sup>Institute for Regenerative Medicine, Sechenov University, Moscow, Russia

<sup>2</sup>A.V. Shubnikov Institute of Crystallography, Federal Scientific Research Center “Crystallography and Photonics” RAS, Moscow, Russia

<sup>3</sup>National Research Center “Kurchatov Institute”, Moscow, Russia

<sup>4</sup>Department of Polymers and Composites, N.N.Semenov Institute of Chemical Physics, Moscow, Russia

<sup>5</sup>FSBSI 'Institute of General Pathology and Pathophysiology', Moscow, Russia

<sup>6</sup>Faculty of Biology, Lomonosov Moscow State University, Moscow, Russia

<sup>7</sup>Bauman Moscow State Technical University, Moscow, Russia

<sup>8</sup>Institute of Photon Technologies, Federal Scientific Research Center “Crystallography and Photonics” RAS, Moscow, Russia

<sup>9</sup>Laser Zentrum Hannover e.V., Hannover, Germany

**Corresponding author:** Anastasia Shpichka – [ana-shpichka@yandex.ru](mailto:ana-shpichka@yandex.ru); +7 9771100358; 2-8 Trubetskaya st., 119991, Moscow, Russia

Table S1– Overall SAXS parameters

**(a) Sample details.**

|                                    | wt                                                                                              | wt:PEG<br>(1:5)                           | wt:PEG(1:10<br>)                          | wt                                                                                                                                                                            | wt:PEG<br>(1:5)                           | wt:PEG(1:10<br>)                          |
|------------------------------------|-------------------------------------------------------------------------------------------------|-------------------------------------------|-------------------------------------------|-------------------------------------------------------------------------------------------------------------------------------------------------------------------------------|-------------------------------------------|-------------------------------------------|
| Sample                             | Fibrinogen                                                                                      |                                           |                                           | Fibrin                                                                                                                                                                        |                                           |                                           |
| Source<br>(catalogue N)            | Sigma-Aldrich (F8630)                                                                           |                                           |                                           | Sigma-Aldrich (F8630)                                                                                                                                                         |                                           |                                           |
| Organism                           | bovine                                                                                          |                                           |                                           | bovine                                                                                                                                                                        |                                           |                                           |
| Length                             | 965 aa                                                                                          |                                           |                                           | 965 aa                                                                                                                                                                        |                                           |                                           |
| MM from<br>chemical<br>composition | 106150.0 Da                                                                                     |                                           |                                           | 106150.0 Da                                                                                                                                                                   |                                           |                                           |
| Concentration<br>range             | 1.0– 25.0 µg/µl                                                                                 |                                           |                                           | 25.0 µg/µl                                                                                                                                                                    |                                           |                                           |
| Preparation,<br>purification       | Diluted solutions of fibrinogen are mixed<br>with PEG solutions at 1:5 and 1:10 molar<br>ratios |                                           |                                           | Diluted solutions of fibrinogen are mixed<br>with PEG solutions at 1:5 and 1:10 molar<br>ratios, after that bovine thrombin (Sigma-<br>Aldrich, T4648) is added to form a gel |                                           |                                           |
| Mixture reaction                   | 2 h at 37°C                                                                                     |                                           |                                           | 2 h at 37°C; 5 min at room temperature                                                                                                                                        |                                           |                                           |
| Solvent                            | PBS buffer, pH7.4                                                                               |                                           |                                           | PBS buffer, pH7.4                                                                                                                                                             |                                           |                                           |
| Additives                          | ---                                                                                             | PEG:NHS<br>(Sigma-<br>Aldrich,<br>713783) | PEG:NHS<br>(Sigma-<br>Aldrich,<br>713783) | ---                                                                                                                                                                           | PEG:NHS<br>(Sigma-<br>Aldrich,<br>713783) | PEG:NHS<br>(Sigma-<br>Aldrich,<br>713783) |

**(b) SAXS data-collection parameters.**

|                                        |                                                                 |
|----------------------------------------|-----------------------------------------------------------------|
| Instrument/data processing             | P12 beamline (PETRA-III) with PILATUS 2M detector <sup>39</sup> |
| Wavelength (Å)                         | 1.24                                                            |
| Beam size (mm)                         | 0.2 x 0.12                                                      |
| Camera length (m)                      | 3.000                                                           |
| s measurement range (Å <sup>-1</sup> ) | 0.00364–0.5033                                                  |
| Normalization                          | To transmitted intensity by pin-diode counter near beam-stop    |
| Monitoring for radiation<br>damage     | Data frame-by-frame comparison                                  |
| Exposure time                          | Continuous 0.05 s data-x 20 frames measurements                 |

|                         |                                                                                                        |
|-------------------------|--------------------------------------------------------------------------------------------------------|
| Sample configuration    | Fibrinogen: Standard SAXS measurements using the automated sample changer<br>Fibrin: in air SAXS setup |
| Sample temperature (°C) | 20                                                                                                     |

**(c) Software employed for SAXS data reduction, analysis and interpretation.**

|                                                 |                                                                                                                                                                                    |
|-------------------------------------------------|------------------------------------------------------------------------------------------------------------------------------------------------------------------------------------|
| SAXS data reduction                             | I(s) vs. s using Bequerel pipeline <sup>40</sup> , solvent subtraction using PRIMUS (ATSAS 2.8.4; <sup>41</sup> )                                                                  |
| Basic analyses: Guinier, P(r), Vp               | PRIMUS and GNOM from ATSAS 2.8.4 <sup>41,42</sup>                                                                                                                                  |
| Shape/bead modelling                            | DAMMIN <sup>44</sup> , DAMMIF <sup>43</sup> via ATSAS online ( <a href="https://www.embl-hamburg.de/biosaxs/atsas-online/">https://www.embl-hamburg.de/biosaxs/atsas-online/</a> ) |
| Validation and averaging of ab initio models    | SUPCOMB <sup>45</sup> and DAMAVER <sup>46</sup>                                                                                                                                    |
| Three-dimensional graphic model representations | MASSHA from ATSAS 2.8.4                                                                                                                                                            |

**(d) Structural parameters.**

| Sample                                                         | Fibrinogen wt | Fibrinogen wt:PEG(1:5) | Fibrinogen wt:PEG(1:10) | Fibrin wt   | Fibrin wt:PEG(1:5) | Fibrin wt:PEG(1:10) |
|----------------------------------------------------------------|---------------|------------------------|-------------------------|-------------|--------------------|---------------------|
| Guinier analysis                                               |               |                        |                         |             |                    |                     |
| Rg (Å)                                                         | 140.1±1.0     | 193.5±1.5              | 237.0±2.0               | 486.0±5.0   | 327.0±4.0          | 242.0±2.0           |
| s <sub>min</sub> (Å <sup>-1</sup> )                            | 0.004         | 0.004                  | 0.004                   | 0.004       | 0.004              | 0.004               |
| sRg <sub>max</sub> (s <sub>min</sub> = 0.004 Å <sup>-1</sup> ) | 1.3           | 1.3                    | 1.3                     | 1.3         | 1.3                | 1.3                 |
| MM from I(0), 10 <sup>3</sup> Da                               | 400±50        | 610±60                 | 900±150                 | 7000±700    | 2500±300           | 980±150             |
| P(r) analysis                                                  |               |                        |                         |             |                    |                     |
| Rg (Å)                                                         | 141.2±1.0     | 195.0±1.5              | 239.0±2.0               | 490.0±5.0   | 330.0±4.0          | 245.0±2.0           |
| Dmax (Å)                                                       | 500±20        | 750±25                 | 900±30                  | 1500±50     | 1300±40            | 950±30              |
| s range (Å <sup>-1</sup> )                                     | 0.004-0.350   | 0.004-0.350            | 0.004-0.350             | 0.004-0.350 | 0.004-0.350        | 0.004-0.350         |
| Total estimate from GNOM                                       | 0.67          | 0.65                   | 0.69                    | 0.58        | 0.69               | 0.71                |

|                                                 |        |         |          |          |          |          |
|-------------------------------------------------|--------|---------|----------|----------|----------|----------|
| M from $I(0)$ , $10^3$ Da                       | 415±50 | 620±60  | 920±150  | 7500±700 | 2700±300 | 980±150  |
| Porod volume ( $V_p$ ) ( $10^3 \text{ \AA}^3$ ) | 670±50 | 1050±70 | 1500±120 | 9500±50  | 3800±200 | 1600±150 |

**(e) Shape model-fitting results.**

| Sample                                           | Fibrinogen<br>wt | Fibrinogen<br>wt:PEG(1:5) | Fibrinogen<br>wt:PEG(1:10) | Fibrin<br>wt | Fibrin<br>wt:PEG(1:5) | Fibrin<br>wt:PEG(1:10) |
|--------------------------------------------------|------------------|---------------------------|----------------------------|--------------|-----------------------|------------------------|
| s range for fitting ( $\text{\AA}^{-1}$ )        | 0.004-0.120      | 0.004-0.110               | 0.004-0.110                | 0.004-0.070  | 0.004-0.100           | 0.004-0.110            |
| Symmetry, aniso-tropy assumpt.                   | P1, none         | P1, none                  | P1, none                   | P1, none     | P1, none              | P1, none               |
| NSD (standard deviation)                         | 1.14             | 1.12                      | 1.15                       | 1.34         | 1.24                  | 1.13                   |
| $\chi^2$ range                                   | 0.90-0.94        | 0.91-0.97                 | 1.01-1.05                  | 1.21-1.26    | 1.22-1.25             | 1.05-1.10              |
| MM estimate as 0.5*volume of models ( $10^3$ Da) | 620              | 950                       | 1350                       | 8900         | 3400                  | 1400                   |

Notations:  $R_g$ , radius of gyration;  $D_{max}$ , maximum size of the particle;  $V_p$ , excluded volume of the hydrated particle; MM, molecular mass;  $\chi^2$  values for the fit from *ab initio* models using DAMMIN/DAMMIF.
